# Supplementary material
Source: Springer Nature journal article supplement (https://www.springermedizin.de/resource/supplementary/12984_2010_318_MOESM5_ESM.pdf/9605762)

### Big Circle Motion Test

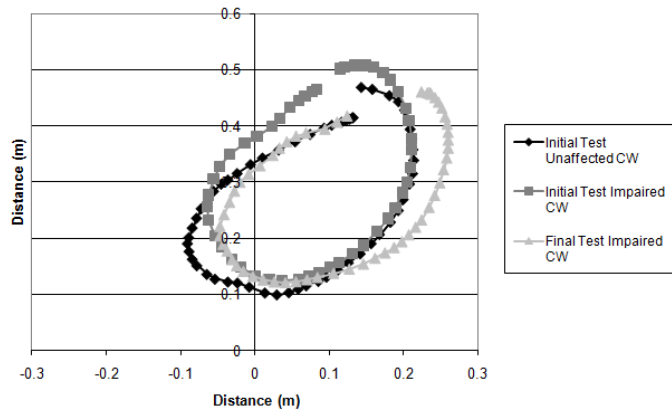

### Small Circle Motion Test

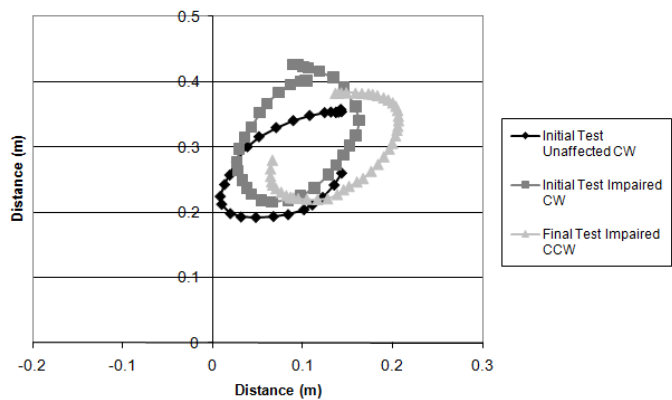

### Line 30 Motion Test

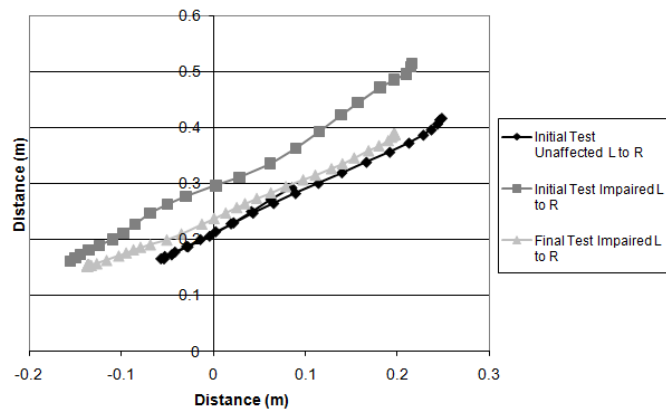

### Line 60 Motion Test

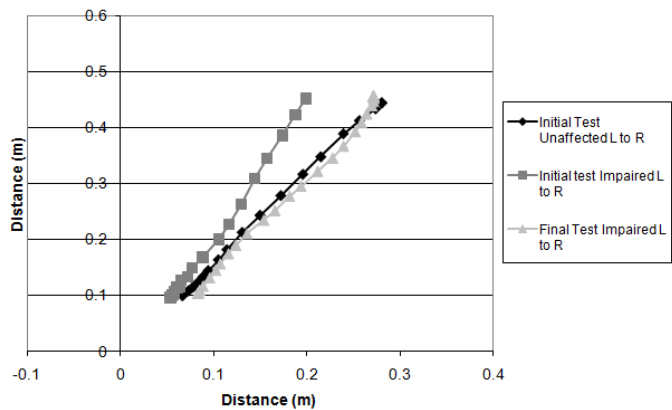

Supplement: MOESM5 [file 9605762]
